# Supplementary material for: Characterization of near-highway submicron aerosols in New York City with a high-resolution aerosol mass spectrometer
Source: Copernicus journal article supplement (doi:10.5194/acp-12-2215-2012), 2012-02-29
Supplement: Supplementary file 1 [file acp-12-2215-2012-supplement.pdf]

## Supplementary Information

### Characterization of Near-Highway Submicron Aerosols in New York City with a High-Resolution Aerosol Mass Spectrometer

Y. L. Sun<sup>1</sup>, Q. Zhang<sup>2</sup>, J. J. Schwab<sup>3</sup>, W. -N. Chen<sup>4</sup>, M.-S. Bae<sup>5</sup>, H. -M. Hung<sup>6</sup>, Y. -C. Lin<sup>4</sup>, N. L. Ng<sup>7\*</sup>, J. Jayne<sup>7</sup>, P. Massoli<sup>7</sup>, L. R. Williams<sup>7</sup>, K. L. Demerjian<sup>3</sup>

<sup>1</sup>*State Key Laboratory of Atmospheric Boundary Layer Physics and Atmospheric Chemistry, Institute of Atmospheric Physics, Chinese Academy of Sciences, Beijing, China*

<sup>2</sup>*Department of Environmental Toxicology, University of California, Davis, California, USA*

<sup>3</sup>*Atmospheric Sciences Research Center, State University of New York at Albany, Albany, New York, USA*

<sup>4</sup>*Research Center for Environmental Changes, Academia Sinica, Taipei, Taiwan*

<sup>5</sup>*Environmental Engineering Department, Mokpo National University, South of Korea*

<sup>6</sup>*Department of Atmospheric Sciences, National Taiwan University, Taipei, Taiwan*

<sup>7</sup>*Aerodyne Research, Inc., Billerica, Massachusetts, USA*

*\*Currently at School of Chemical and Biomolecular Engineering and School of Earth and Atmospheric Sciences, Georgia Institute of Technology, Atlanta, Georgia, USA*

Correspondence to:

Q. Zhang ([dkwzhang@ucdavis.edu](mailto:dkwzhang@ucdavis.edu))

Y.L. Sun ([sunyele@mail.iap.ac.cn](mailto:sunyele@mail.iap.ac.cn))

## 26 1 Investigation of silicone contamination

27 During the first roadside measurements on 27 July, highly elevated  $m/z$ 's, e.g., 73, 147, 201,  
28 221, and 281 in the mass spectra of ambient OA were frequently observed (Fig. S5). Previous  
29 studies have confirmed that such  $m/z$  series are mainly from the fragmentation of polymer of  
30 dimethylsiloxane ( $\text{SiO}(\text{CH}_3)_2$ ), e.g., the conductive silicone tubing (Schneider et al., 2006;  
31 Timko et al., 2009; Yu et al., 2009). Consistently, we observed similar  $m/z$  series in the mass  
32 spectra of vehicle exhaust from the gasoline generator (Fig. S5). The contamination from  
33 silicone tubing not only absorbs gaseous  $\text{CO}_2$ , but also artificially increases organic mass (Timko  
34 et al., 2009). This contamination is particularly substantial for the engine exhaust measurements  
35 since the emissions are enhanced when the tubing is heated. In our study, a 12-foot silicone  
36 coated fiberglass hose (Hi-Tech Duravent) was directly connected to the gasoline generator and a  
37 second 25-foot thermoplastic rubber reinforced with a wire helix (Flex-Flyte L-9) was then  
38 connected to the first hose. The generator exhausts were emitted to the atmosphere after passing  
39 the first and second hoses. A detailed check of the  $m/z$  series of silicon fragmentation during the  
40 four measurements (e.g., Fig. S5) suggests the most significant impact of silicone contamination  
41 on 27 July, and then much reduced influences on 28 July, and almost no impacts on the  
42 following two deployments. This indicates that the contamination is mainly from the first hose  
43 coated with silicones inside, which are emitted significantly when heated (temperature  $> 70^\circ\text{C}$   
44 though we never measured it). To further evaluate the contribution of contaminations, we  
45 performed PMF analysis to the unit mass resolution (UMR) spectra with  $m/z$  up to 300. Four  
46 components were identified including HOA, SV-OOA, LV-OOA and a component representing  
47 the silicone-contaminated OA. The small component of NOA was not able to be resolved from  
48 UMR-PMF analysis; instead another component showing the  $m/z$  series of silicon contamination  
49 was identified. The mass spectra and time series for each component are shown in Fig. S6. As  
50 HOA, SV-OOA, and LV-OOA show very similar spectral patterns to those from HR-PMF  
51 analysis, the exhaust component however resembles that of vehicle exhaust with silicone  
52 contamination over  $m/z \geq 73$ . The differences at small  $m/z$ 's below 73 suggest that the generator  
53 exhausts might have mixed with ambient aerosols. It's interesting to note that the silicone  
54 contamination is very consistent with the operations of gasoline generator used as the power  
55 supply (Fig. S7). When the generator was on, clear silicone contamination from the exhaust  
56 tubing was observed, however, when Li batteries were used as a surrogate and no emissions of

57 vehicle exhaust at the same time, the silicone contamination correspondingly went away. As  
 58 shown in Fig. S7, the silicone contamination was most significant and sporadic on 27 July with  
 59 the contribution up to 45% to the OA. Such substantial silicone contamination might affect the  
 60 composition and properties of aerosol particles. The data on 27 July is therefore not discussed in  
 61 the text, but presented in Fig. S8. Although silicone contamination on 28 July still existed, the  
 62 contribution was much reduced, generally less than 10%. The contamination was not observed in  
 63 the two following measurements on 30 July and 1 August, respectively.

64

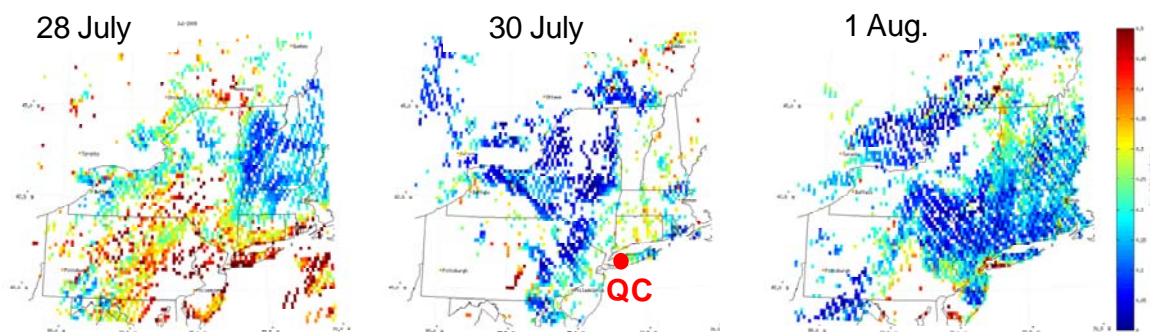

65

66 Fig. S1. Aerosol Optical Depth (AOD) retrieved from Terra MODIS at 550 nm on 28 July, 30  
 67 July and 1 August, respectively.

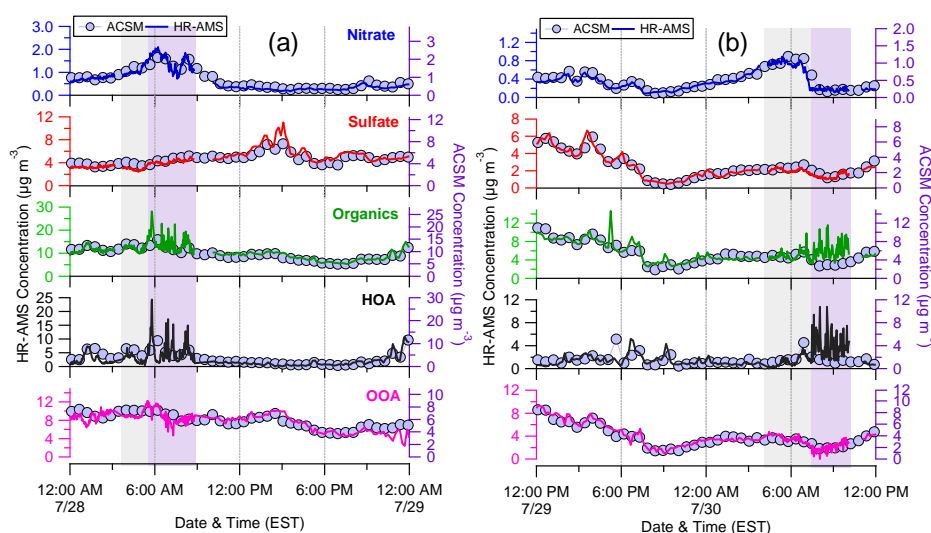

68

69 Fig.S2. Comparisons of time series organics, sulfate, nitrate, HOA and OOA measured by HR-  
 70 AMS and ACSM on (a) 28 July and (b) 30 July. The shaded areas indicate the HR-AMS  
 71 measurements near roadway.

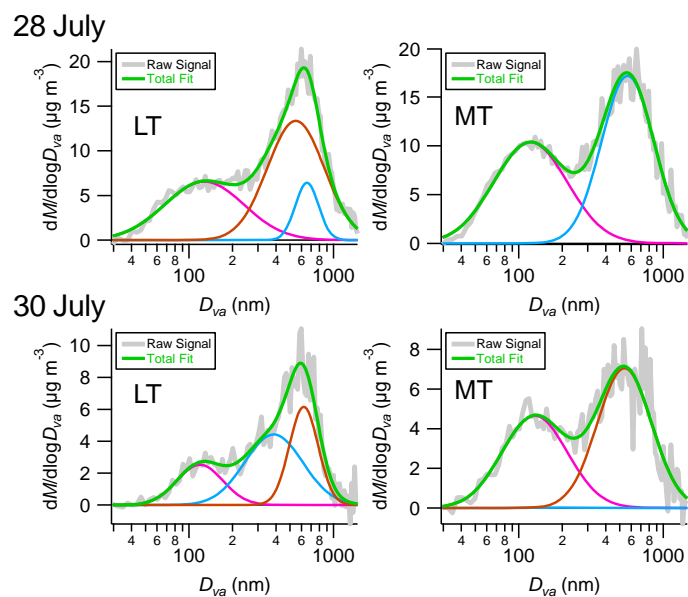

72

73 Fig. S3. Lognormal fittings of average size distributions of organics during LT and MT periods  
 74 on 28 and 30 July, respectively.

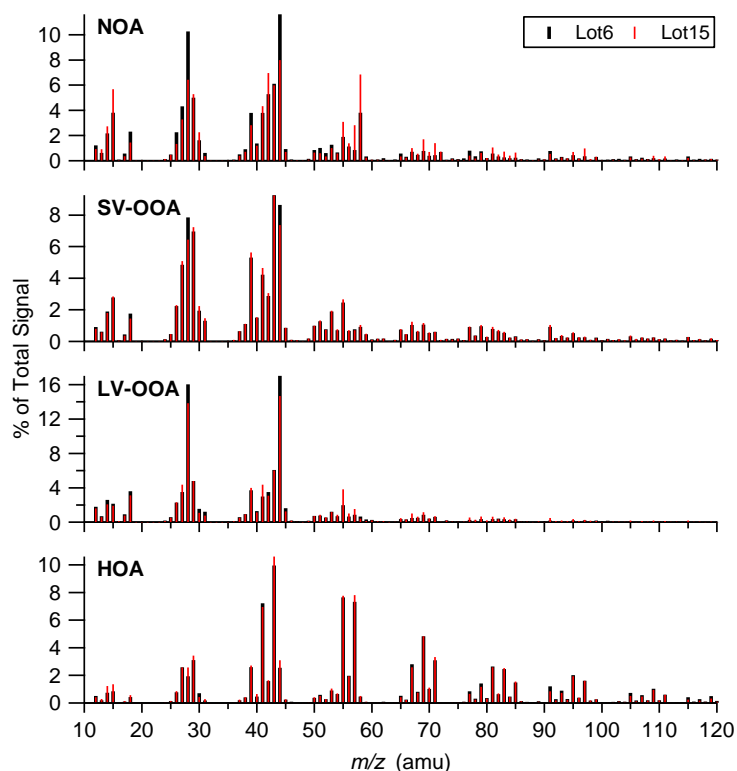

75

76 Fig. S4. The mass spectral comparisons of OA components between Lot 6 and Lot 15. Note that  
 77 the mass spectra of OA components at Lot6 and Lot15 are from five and four component  
 78 analyses, respectively because the OA near roadway didn't resolve the cooking-related OA.

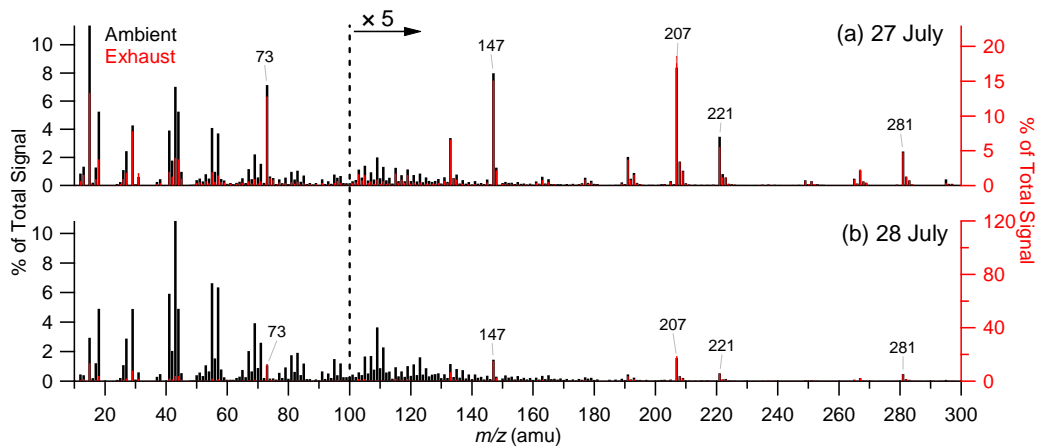

79

80 Fig. S5. Mass spectral comparisons between ASRC-ML generator exhaust and ambient OA with  
 81 silicone contamination on (a) 27 July and (b) 28 July.

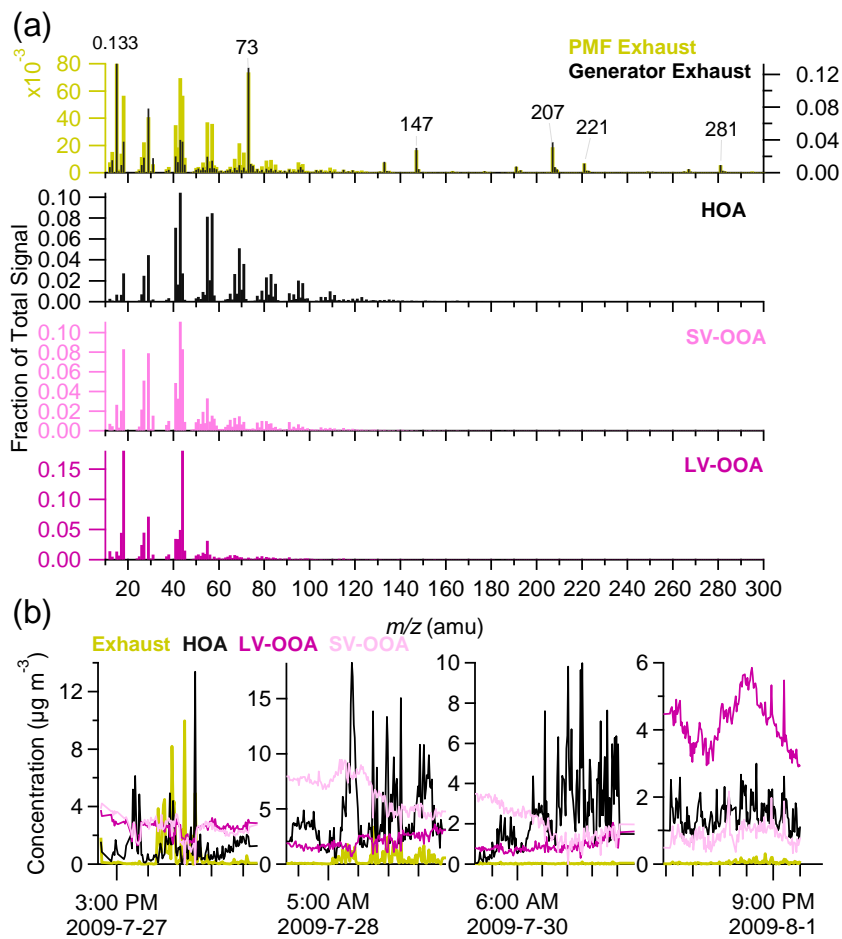

82

83 Fig. S6. (a) Mass spectra of OA components from UMR-PMF analysis. The mass spectrum of  
 84 generator exhaust is also shown for a reference; (b) time series of mass concentrations of OA  
 85 components for the four roadside measurements.

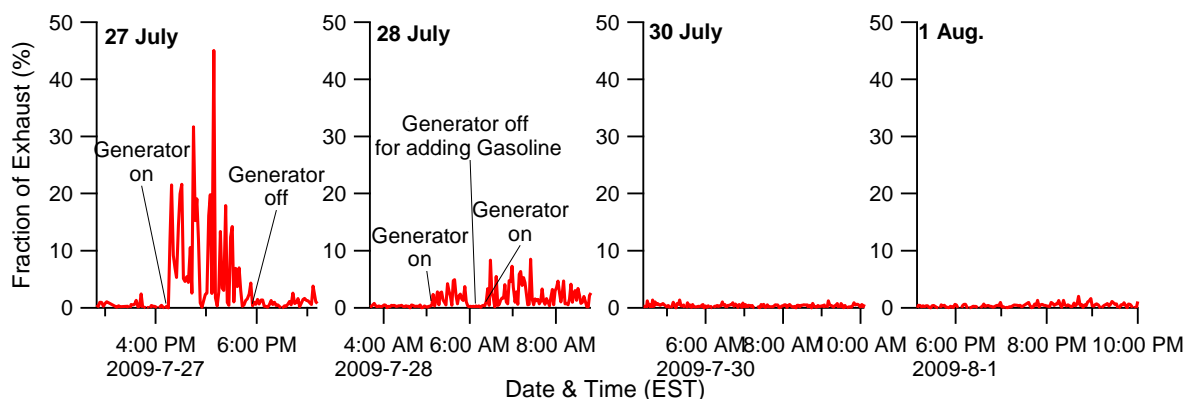

86

87 Fig. S7. Contribution of ASRC-ML generator exhaust to the total OA during four roadside  
 88 measurements. The operations of generator are also marked on the plot as a reference.

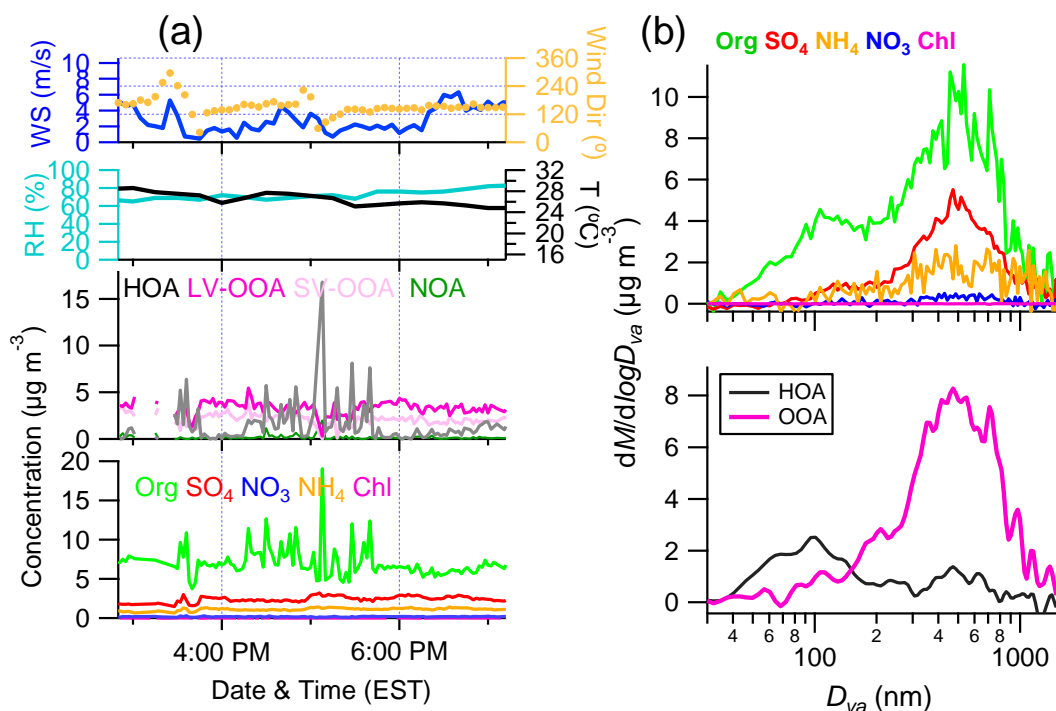

89

90 Fig. S8. (a) Time series of mass concentrations of NR-PM<sub>1</sub> species (organics, sulfate, nitrate,  
 91 ammonium, and chloride), OA components (LV-OOA, SV-OOA, HOA, and NOA) and  
 92 meteorology, and (b) Average size distributions of NR-PM<sub>1</sub> species, HOA and OOA during the  
 93 roadside measurement of 27 July. Note that the size distributions of HOA and OOA were  
 94 smoothed by 3 points using binominal algorithm.

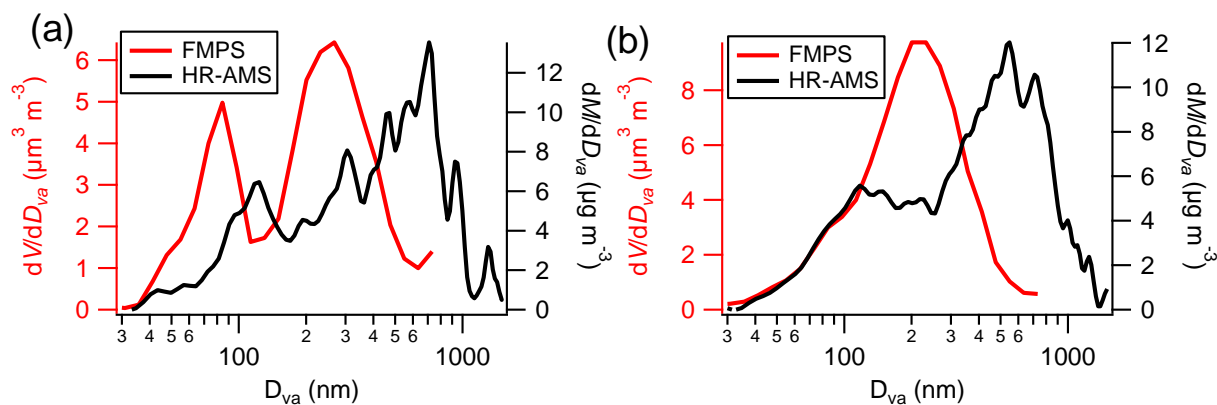

95  
 96 Fig. S9. The comparison of average volume-weighted size distributions from the FMPS  
 97 measurements and mass-weighted size distributions from the HR-AMS measurements during (a)  
 98 LT and (b) MT periods on 30 July. The  $D_m$  was converted to  $D_{va}$  by multiplying the estimated  
 99 density of  $1.4 \mu\text{g m}^{-3}$  assuming that the particles are sphere.

100  
 101 References:

102 Schneider, J., Weimer, S., Drewnick, F., Borrmann, S., Helas, G., Gwaze, P., Schmid, O.,  
 103 Andreae, M. O., and Kirchner, U.: Mass spectrometric analysis and aerodynamic  
 104 properties of various types of combustion-related aerosol particles, *Int. J. Mass Spectrom.*,  
 105 258, 37-49, 2006.  
 106 Timko, M. T., Yu, Z., Kroll, J., Jayne, J. T., Worsnop, D. R., Miake-Lye, R. C., Onasch, T. B.,  
 107 Liscinsky, D., Kirchstetter, T. W., Destailhats, H., Holder, A. L., Smith, J. D., and Wilson,  
 108 K. R.: Sampling Artifacts from Conductive Silicone Tubing, *Aerosol Sci. Tech.*, 43, 855-  
 109 865, 2009.  
 110 Yu, Y., Liz Alexander, M., Perraud, V., Bruns, E. A., Johnson, S. N., Ezell, M. J., and Finlayson-  
 111 Pitts, B. J.: Contamination from electrically conductive silicone tubing during aerosol  
 112 chemical analysis, *Atmos. Environ.*, 43, 2836-2839, 2009.
